# Supplementary material for: Skin Manifestations in COVID-19: Prevalence and Relationship with Disease Severity
Source: PubMed Central journal article supplement (PMC7599735; doi:10.3390/jcm9103261), 2020-10-12
Supplement: jcm-09-03261-s001.pdf [file jcm-09-03261-s001.pdf]

# 1 **Supplementary Material**

2 **Summary of contents**

3 **1. Supplementary Table 1 p 2 - 8**

4 **1. Selected case studies:**

5 - Suppl. Figure 1 A and B p 9

6 - Suppl. Figure 2 A and B p 10

7 - Suppl. Figure 3 A and B p 11

8 - Suppl. Figure 4 A and B p 12

9

Table S1. Case-by-case description of the 58 patients included in the study.

| Sex | Age    | Cutaneous presentation | COVID-19 symptoms other than cutaneous | Days from the start of COVID-19 to the appearance of skin lesions | Covid-19 PCR | Covid-19 serology | Chest X-ray | CPR mg/dL | Lymphocytes cell/m <sup>3</sup> | Ferritin ng/ml | LDH mg/dL | D-dimer ng/ml | Histologic pattern H/E | DIF                       | AntiC9 IHQ    | Treatment | Hospitalization required | ICU required |    |
|-----|--------|------------------------|----------------------------------------|-------------------------------------------------------------------|--------------|-------------------|-------------|-----------|---------------------------------|----------------|-----------|---------------|------------------------|---------------------------|---------------|-----------|--------------------------|--------------|----|
| 1   | Male   | 23                     | Chilblain-like                         | -                                                                 | Negative     | Negative          | Normal      | 0.40      | 1200                            | 936            | 190       | 300           | Chilblain-like pattern | Lichenoid + vasculopathic | Positive      |           | No                       | No           |    |
| 2   | Male   | 42                     | Chilblain-like                         | -                                                                 | Negative     | Negative          | -           | 0.40      | 2000                            | 197            | 153       | 200           | Chilblain-like pattern | Lichenoid + vasculopathic | Positive      |           | No                       | No           |    |
| 3   | Male   | 47                     | Chilblain-like                         | Cough                                                             | 4            | Negative          | Negative    | -         | 0.40                            | 1100           | 198       | 193           | 200                    | -                         | -             | -         | No                       | No           |    |
| 4   | Female | 26                     | Chilblain-like                         | Anosmia, Augesia, Fever                                           | 21           | Negative          | Positive    | -         | 0.40                            | 1800           | 14        | 156           | 300                    | -                         | -             | -         | No                       | No           |    |
| 5   | Male   | 26                     | Chilblain-like                         | -                                                                 | Negative     | Negative          | -           | 0.40      | 1200                            | 106            | 137       | 200           | Chilblain-like pattern | Lichenoid + vasculopathic | Positive      |           | No                       | No           |    |
| 6   | Female | 25                     | Chilblain-like                         | -                                                                 | -            | Negative          | -           | 0.40      | 1400                            | 67             | 174       | 200           | -                      | -                         | -             |           | No                       | No           |    |
| 7   | Male   | 47                     | Chilblain-like                         | Anosmia, Augesia, Cough, Diarrhoea, Fever                         | 30           | Positive          | -           | -         | 0.40                            | 1900           | 143       | 197           | 200                    | Chilblain-like pattern    | Vasculopathic | Positive  |                          | No           | No |

|    | Sex    | Age | Cutaneous presentation | COVID-19 symptoms other than cutaneous | Days from the start of COVID-19 to the appearance of skin lesions | Covid-19 PCR | Covid-19 serology | Chest X-ray                    | CPR mg/dL | Lymphocytes cell/mm <sup>3</sup> | Ferritin ng/ml | LDH mg/dL | D-dimer ng/ml | Histologic pattern H/E | DIF           | AntiC9 IHQ | Treatment       | Hospitalization required | ICU required |
|----|--------|-----|------------------------|----------------------------------------|-------------------------------------------------------------------|--------------|-------------------|--------------------------------|-----------|----------------------------------|----------------|-----------|---------------|------------------------|---------------|------------|-----------------|--------------------------|--------------|
| 8  | Male   | 26  | Chilblain-like         | Cough                                  | 0                                                                 | Negative     | Positive          | Normal                         | 0.40      | 2000                             | 114            | 175       | 300           | Chilblain-like pattern | Vasculopathic | Positive   |                 | No                       | No           |
| 9  | Female | 54  | Chilblain-like         | Myalgias                               | 0                                                                 | Negative     | Negative          | Normal                         | 0.40      | 1600                             | 69             | 217       | 200           | Chilblain-like pattern | Negative      | Positive   |                 | No                       | No           |
| 10 | Male   | 55  | Chilblain-like         | Fever                                  | 17                                                                | -            | Positive          | -                              | 0.62      | 2500                             | 868            | 179       | 6000          | Chilblain-like pattern | -             | Negative   |                 | Yes                      | No           |
| 11 | Male   | 16  | Chilblain-like         |                                        | -                                                                 | Negative     | Negative          | -                              | 0.40      | 3000                             | 47             | 179       | 200           | Chilblain-like pattern | Vasculopathic | Positive   |                 | No                       | No           |
| 12 | Male   | 50  | Chilblain-like         | Cough, Dyspnea, Fever                  | 34                                                                | Positive     | -                 | Bilateral interstitial pattern | 30.40     | 500                              | 1020           | 316       | 10000         | -                      | -             | -          | HQ, L/R, CO, TC | Yes                      | Yes          |
| 13 | Female | 29  | Chilblain-like         |                                        | -                                                                 | -            | Negative          | -                              | 0.40      | 1800                             | 4              | 167       | 300           | Chilblain-like pattern | Negative      | Positive   |                 | No                       | No           |
| 14 | Female | 36  | Chilblain-like         | Asthenia, Cough                        | 17                                                                | Positive     | Negative          | Bilateral interstitial pattern | 0.40      | 3000                             | 19             | 172       | 200           | Psoriasiform           | Negative      | -          |                 | No                       | No           |
| 15 | Female | 16  | Chilblain-like         |                                        | -                                                                 | Negative     | Negative          | -                              | 0.40      | 1200                             | 5              | 141       | 200           | Chilblain-like pattern | Vasculopathic | Positive   |                 | No                       | No           |
| 16 | Male   | 17  | Chilblain-like         |                                        | -                                                                 | Negative     | Negative          | -                              | 0.40      | 1900                             | 67             | 189       | 200           | Chilblain-like pattern | Negative      | Positive   |                 | No                       | No           |

|    | Sex    | Age | Cutaneous presentation             | COVID-19 symptoms other than cutaneous                      | Days from the start of COVID-19 to the appearance of skin lesions | Covid-19 PCR | Covid-19 serology | Chest X-ray                    | CPR mg/dL | Lymphocytes cell/mm <sup>3</sup> | Ferritin ng/ml | LDH mg/dL | D-dimer ng/ml | Histologic pattern H/E            | DIF      | AntiC9 IHQ | Treatment             | Hospitalization required | ICU required |
|----|--------|-----|------------------------------------|-------------------------------------------------------------|-------------------------------------------------------------------|--------------|-------------------|--------------------------------|-----------|----------------------------------|----------------|-----------|---------------|-----------------------------------|----------|------------|-----------------------|--------------------------|--------------|
| 17 | Female | 52  | Chilblain-like                     | Cough                                                       | 4                                                                 | -            | Positive          | -                              | -         | -                                | -              | -         | -             | -                                 | -        | -          |                       | No                       | No           |
| 18 | Female | 76  | Generalized maculopapular eruption | Diarrhea, Fever                                             | 20                                                                | Positive     | -                 | Bilateral interstitial pattern | 4.50      | 800                              | 598            | 328       | 600           | -                                 | -        | -          | HQ, AZT, L/R, CO, STX | Yes                      | Yes          |
| 19 | Female | 80  | Generalized maculopapular eruption | Cough, Diarrhea, Fever, Headache                            | 14                                                                | Positive     | -                 | Bilateral interstitial pattern | 2.54      | 600                              | 281            | 243       | 200           | Spongiotic dermatitis             | -        | Negative   | HQ, AZT, L/R, CO      | Yes                      | No           |
| 20 | Female | 50  | Generalized maculopapular eruption | Anosmia, Augesia, Cough, Diarrhea, Dyspnea, Fever, Myalgias | 4                                                                 | Positive     | -                 | Bilateral interstitial pattern | 6.66      | 600                              | 112            | 288       | 400           | Interface + spongiotic dermatitis | -        | Negative   | HQ, AZT, L/R          | Yes                      | No           |
| 21 | Female | 70  | Generalized maculopapular eruption | Fever, Myalgias                                             | 0                                                                 | Negative     | Positive          | Normal                         | 3.00      | 600                              | 244            | 264       | 1600          | Interface + spongiotic dermatitis | Negative | Negative   |                       | No                       | No           |
| 22 | Female | 87  | Generalized maculopapular eruption | Dyspnea, Fever, Myalgias                                    | 16                                                                | Positive     | -                 | Bilateral interstitial pattern | 5.67      | 600                              | 341            | 478       | 1500          | Spongiotic dermatitis             | -        | Negative   | HQ, AZT               | Yes                      | No           |

|    |        |     |                                    |                                           |                                                                   |              |                   |                                |           |                                  |                |           |               |                                   |          |            |                           |                          |              |
|----|--------|-----|------------------------------------|-------------------------------------------|-------------------------------------------------------------------|--------------|-------------------|--------------------------------|-----------|----------------------------------|----------------|-----------|---------------|-----------------------------------|----------|------------|---------------------------|--------------------------|--------------|
| 23 | Male   | 51  | Generalized maculopapular eruption | Cough, Dyspnea, Fever, Headache           | 11                                                                | Positive     | -                 | Bilateral interstitial pattern | 14.91     | 1100                             | 1406           | 239       | 500           | Spongiotic dermatitis             | -        | Negative   | HQ, AZT, L/R, Rem         | Yes                      | No           |
| 24 | Male   | 58  | Generalized maculopapular eruption | Asthenia, Fever                           | 20                                                                | Positive     | Positive          | Bilateral interstitial pattern | 11.32     | 1400                             | 212            | 234       | 600           | Subcorneal pustulosis             | Negative | -          | HQ, AZT, L/R, CO          | Yes                      | No           |
| 25 | Male   | 57  | Generalized maculopapular eruption | Cough, Diarrhea, Dyspnea, Fever, Myalgias | 20                                                                | Positive     | -                 | Bilateral interstitial pattern | 3.14      | 800                              | 356            | 212       | 200           | Urticiform                        | -        | Negative   | HQ, AZT, L/R, CO, TC      | Yes                      | Yes          |
| 26 | Male   | 64  | Generalized maculopapular eruption | Augesia, Cough, Fever                     | 26                                                                | Positive     | -                 | Bilateral interstitial pattern | 14.95     | 800                              | 693            | 322       | 300           | Interface + spongiotic dermatitis | -        | Negative   | HQ, AZT, L/R, TC          | Yes                      | No           |
| 27 | Female | 64  | Generalized maculopapular eruption | Asthenia, Augesia, Fever, Myalgias        | 3                                                                 | Negative     | Negative          | -                              | 3.37      | 700                              | 175            | 242       | 4400          | Interface + spongiotic dermatitis | Negative | Positive   |                           | No                       | No           |
| 28 | Male   | 40  | Generalized maculopapular eruption | Cough, Diarrhea, Fever, Myalgias          | 24                                                                | Negative     | -                 | Bilateral interstitial pattern | 31.55     | 900                              | 1031           | 519       | 600           | Spongiotic dermatitis             | -        | Negative   | HQ, AZT, L/R, CO, TC, ANK | Yes                      | Yes          |
|    | Sex    | Age | Cutaneous presentation             | COVID-19 symptoms other than cutaneous    | Days from the start of COVID-19 to the appearance of skin lesions | Covid-19 PCR | Covid-19 serology | Chest X-ray                    | CPR mg/dL | Lymphocytes cell/mm <sup>3</sup> | Ferritin ng/ml | LDH mg/dL | D-dimer ng/ml | Histologic pattern H/E            | DIF      | AntiC9 IHQ | Treatment                 | Hospitalization required | ICU required |

|    |        |    |                                                                   |                                             |    |          |          |                                |       |      |     |     |       |                          |          |          |                           |     |     |
|----|--------|----|-------------------------------------------------------------------|---------------------------------------------|----|----------|----------|--------------------------------|-------|------|-----|-----|-------|--------------------------|----------|----------|---------------------------|-----|-----|
| 29 | Male   | 25 | Generalized maculopapular eruption                                | Cough, Dyspnea, Fever                       | 34 | Positive | -        | Bilateral interstitial pattern | -     | -    | -   | -   | -     | Other                    | -        | Negative | HQ, AZT, L/R, CO, TC      | Yes | Yes |
| 30 | Male   | 78 | Grover's disease and other papulovesicular eruptions <sup>1</sup> | Asthenia, Augesia, Cough, Dyspnea, Vomit    | 22 | -        | -        | Bilateral interstitial pattern | 8.65  | 1000 | 636 | 291 | 5200  | Grover's disease pattern | Negative | Negative | HQ, AZT, L/R              | Yes | No  |
| 31 | Male   | 61 | Grover's disease and other papulovesicular eruptions <sup>1</sup> | Asthenia, Cough, Diarrhoea, Fever, Myalgias | 39 | Positive | -        | Bilateral interstitial pattern | 10.46 | 600  | 764 | 662 | 10000 | Grover's disease pattern | -        | Positive | HQ, AZT, L/R, CO, TC, ANK | Yes | Yes |
| 32 | Female | 50 | Grover's disease and other papulovesicular eruptions <sup>1</sup> | Asthenia, Augesia, Cough, Dyspnea, Fever    | 10 | Positive | -        | Bilateral interstitial pattern | 4.96  | 500  | 26  | 285 | 800   | Grover's disease pattern | Negative | Negative | HQ, AZT, L/R, Rem         | Yes | No  |
| 33 | Female | 24 | Grover's disease and other papulovesicular eruptions <sup>2</sup> | Cough, Dyspnea                              | 0  | Negative | Positive | Other pattern                  | 5.60  | 1200 | -   | 187 | 700   | -                        | -        | -        | CO                        | No  | No  |
| 34 | Male   | 38 | Grover's disease and other papulovesicular eruptions <sup>2</sup> | Anosmia, Augesia, Cough, Fever              | 14 | Negative | Positive | Normal                         | 1.00  | 800  | 159 | 239 | 900   | Interface dermatitis     | Negative | -        |                           | No  | No  |

|    | Sex    | Age | Cutaneous presentation                                            | COVID-19 symptoms other than cutaneous  | Days from the start of COVID-19 to the appearance of skin lesions | Covid-19 PCR | Covid-19 serology | Chest X-ray                    | CPR mg/dL | Lymphocytes cell/m <sup>3</sup> | Ferritin ng/ml | LDH mg/dL | D-dimer ng/ml | Histologic pattern H/E            | DIF      | AntiC9 IHQ | Treatment             | Hospitalization required | ICU required |
|----|--------|-----|-------------------------------------------------------------------|-----------------------------------------|-------------------------------------------------------------------|--------------|-------------------|--------------------------------|-----------|---------------------------------|----------------|-----------|---------------|-----------------------------------|----------|------------|-----------------------|--------------------------|--------------|
| 35 | Female | 66  | Grover's disease and other papulovesicular eruptions <sup>3</sup> | Cough, Fever                            | 4                                                                 | -            | -                 | Bilateral interstitial pattern | 18.15     | 1200                            | 632            | 354       | 400           | -                                 | -        | -          | HQ, AZT, L/R, CO, TC  | Yes                      | Yes          |
| 36 | Female | 36  | Grover's disease and other papulovesicular eruptions <sup>4</sup> | Anosmia, Diarrhoea                      | 9                                                                 | Positive     | -                 | Bilateral interstitial pattern | 0.40      | 1700                            | 70             | 182       | 500           | Folliculitis                      | Negative | -          | HQ, AZT               | Yes                      | No           |
| 37 | Male   | 46  | Grover's disease and other papulovesicular eruptions <sup>4</sup> | Cough, Dyspnea, Fever                   | 11                                                                | Positive     | -                 | Bilateral interstitial pattern | 6.09      | 700                             | 684            | 509       | 600           | Folliculitis                      | -        | -          | HQ, AZT, L/R, CO      | Yes                      | Yes          |
| 38 | Female | 78  | Urticarial eruption                                               | Asthenia, Cough, Fever, Myalgias, Vomit | 28                                                                | Positive     | -                 | Bilateral interstitial pattern | 5.88      | 1300                            | 903            | 289       | 8100          | Interface + spongiotic dermatitis | Negative | Negative   | HQ, AZT, CO, Rem, STX | Yes                      | Yes          |
| 39 | Female | 57  | Urticarial eruption                                               | Asthenia, Cough, Diarrhoea, Dyspnea,    | 43                                                                | Positive     | -                 | Bilateral interstitial pattern | 3.94      | 1000                            | 776            | 389       | 900           | Spongiotic dermatitis             | Negative | Negative   | HQ, AZT, L/R, CO, TC  | Yes                      | Yes          |





|    | Sex  | Age | Cutaneous presentation                                               | COVID-19 symptoms other than cutaneous      | Days from the start of COVID-19 to the appearance of skin lesions | Covid-19 PCR | Covid-19 serology | Chest X-ray                    | CPR mg/dL | Lymphocytes cell/mm3 | Ferritin ng/ml | LDH mg/dL | D-dimer ng/ml | Histological pattern H/E | DIF           | AntiC9 IHQ | Treatment                 | Hospitalization required | ICU required |
|----|------|-----|----------------------------------------------------------------------|---------------------------------------------|-------------------------------------------------------------------|--------------|-------------------|--------------------------------|-----------|----------------------|----------------|-----------|---------------|--------------------------|---------------|------------|---------------------------|--------------------------|--------------|
| 45 | Male | 74  | Livedo reticularis                                                   | Dyspnea, Fever                              | 31                                                                | -            | Positive          | Bilateral interstitial pattern | -         | -                    | -              | -         | -             | Spongiotic dermatitis    | Negative      | Negative   | HQ, AZT, L/R, CO          | Yes                      | Yes          |
| 46 | Male | 69  | Others: Pressure-induced ischemic necrosis in prolonged coma patient | Asthenia, Dyspnea, Fever, Myalgias          | 19                                                                | Positive     | -                 | Bilateral interstitial pattern | 30.78     | 800                  | 1624           | 508       | 2000          | Other                    | Vasculopathic | Positive   | HQ, AZT, L/R, CO, TC, ANK | Yes                      | Yes          |
| 47 | Male | 63  | Others: Hematoma                                                     | Asthenia, Cough, Dyspnea, Fever, Myalgias   | 8                                                                 | Negative     | -                 | Bilateral interstitial pattern | 1.53      | 600                  | 373            | 4094      | 3200          | -                        | -             | -          | HQ, AZT                   | Yes                      | No           |
| 48 | Male | 45  | Others: Lichen planus                                                | Anosmia, Asthenia, Augesia, Fever, Headache | 29                                                                | Negative     | Positive          | -                              | 0.40      | 1200                 | 233            | 246       | 500           | Interface dermatitis     | Lichenoid     | -          | -                         | No                       | No           |
| 49 | Male | 78  | Others: Contact dermatitis                                           | Dyspnea, Fever                              | 33                                                                | Positive     | -                 | Bilateral interstitial pattern | 36.98     | 600                  | 525            | 417       | 800           | -                        | -             | -          | HQ, AZT, L/R, CO, TC      | Yes                      | Yes          |

|            |            |                       |                                                                      |                                           |                     |                          |                    |                                 |                    |                       |                  |                      |                            |                       |                   |                  |                                 |                     |            |
|------------|------------|-----------------------|----------------------------------------------------------------------|-------------------------------------------|---------------------|--------------------------|--------------------|---------------------------------|--------------------|-----------------------|------------------|----------------------|----------------------------|-----------------------|-------------------|------------------|---------------------------------|---------------------|------------|
| 50         | Male       | 68                    | Others: Psoriasis                                                    | Asthenia, Cough, Dyspnea, Fever, Myalgias | 37                  | -                        | Positive           | Unilateral interstitial pattern | 28.16              | 500                   | 2628             | 457                  | 1000                       | Subcorneal pustulosis | Negative          | -                | HQ, AZT, L/R, CO, TC            | Yes                 | No         |
| 51         | Female     | 92                    | Others: Generalized fixed drug eruption                              | Dyspnea                                   | -6                  | Negative                 | Positive           | Unilateral interstitial pattern | 1.11               | 1500                  | 38               | 316                  | 2100                       | Other                 | Lichenoid         | -                |                                 | Yes                 | No         |
| 52         | Female     | 74                    | Others: Contact dermatitis                                           | Asthenia, Cough, Dyspnea, Fever           | 34                  | Positive                 | -                  | Bilateral interstitial pattern  | 0.40               | 600                   | 73               | 322                  | 800                        | -                     | -                 | -                | HQ, AZT, L/R, CO, TC            | Yes                 | Yes        |
| 53         | Female     | 58                    | Others: Benign familial pemphigus                                    | Cough, Diarrhoea, Fever, Vomit            | 8                   | Positive                 | -                  | Normal                          | 6.17               | 800                   | 558              | 295                  | 400                        | -                     | -                 | -                | HQ, AZT, L/R                    | Yes                 | No         |
| 54         | Male       | 61                    | Others: Pressure-induced ischemic necrosis in prolonged coma patient | Cough, Fever                              | 37                  | Positive                 | -                  | Bilateral interstitial pattern  | 15.51              | 600                   | 635              | 293                  | 800                        | -                     | -                 | -                | HQ, AZT, CO, TC, Rem            | Yes                 | Yes        |
| 55         | Female     | 46                    | Others: Chronic graft-versus-host disease                            | Asthenia, Diarrhoea, Fever, Myalgias      | 1                   | Negative                 | -                  | Bilateral interstitial pattern  | 0.44               | 1600                  | 1006             | 163                  | 1100                       | -                     | -                 | -                | HQ                              | Yes                 | No         |
| <b>Sex</b> | <b>Age</b> | <b>Cutaneous prep</b> | <b>COVID-19 symptoms other than cutaneous</b>                        | <b>Days from the start of COVID-</b>      | <b>Covid-19 PCR</b> | <b>Covid-19 serology</b> | <b>Chest X-ray</b> | <b>CPR mg/dL</b>                | <b>Lymphocytes</b> | <b>Ferritin ng/ml</b> | <b>LDH mg/dL</b> | <b>D-dimer ng/ml</b> | <b>Histologic al patte</b> | <b>DIF</b>            | <b>AntiC9 IHQ</b> | <b>Treatment</b> | <b>Hospitalization required</b> | <b>ICU required</b> | <b>Sex</b> |

|    |        | sen<br>tati<br>on |                                           | 19 to the<br>appearan<br>ce of<br>skin<br>lesions |    |          |   | cell/<br>mm<br>3                         |      |      |      | rn<br>H/E |      |       |                   |   |                                |     |     |
|----|--------|-------------------|-------------------------------------------|---------------------------------------------------|----|----------|---|------------------------------------------|------|------|------|-----------|------|-------|-------------------|---|--------------------------------|-----|-----|
| 56 | Female | 72                | Others:<br>Stasis<br>dermatitis           | Cough,<br>Dyspnea                                 | 11 | -        | - | Other<br>pattern                         | 2.01 | 1300 | 231  | 299       | 400  | Other | Vasculop<br>athic | - | HQ,<br>AZT,<br>L/R, CO         | Yes | No  |
| 57 | Female | 59                | Others:<br>Dermatoph<br>ytosis            | Dyspnea,<br>Fever                                 | 26 | Positive | - | Bilateral<br>interstiti<br>al<br>pattern | 4.84 | 1600 | 912  | 503       | 9900 | -     | -                 | - | HQ,<br>AZT,<br>L/R, TC         | Yes | Yes |
| 58 | Male   | 69                | Others:<br>Eruptive<br>cherry<br>angiomas | Cough,<br>Dyspnea,<br>Fever                       | 17 | Positive | - | Bilateral<br>interstiti<br>al<br>pattern | 9.09 | 300  | 2195 | 327       | 3400 | -     | -                 | - | HQ,<br>AZT,<br>L/R, CO,<br>ANK | Yes | Yes |

**11** Grover's disease and other papulo-vesicular eruptions: <sup>1</sup>: Grover disease; <sup>2</sup>: chickenpox; <sup>3</sup>: herpes zoster; <sup>4</sup>: *Pityrosporum spp* folliculitis. HQ: Hydroxychloroquine;  
**12** AZT: Azithromycin; L/R: Lopinavir/ritonavir; TC: Tocilizumab; Rem: Remdesivir; CO: Systemic corticosteroids; ANK: Anakinra; STX: Siltuximab.

# Supplementary Figures

## Selected Case Studies

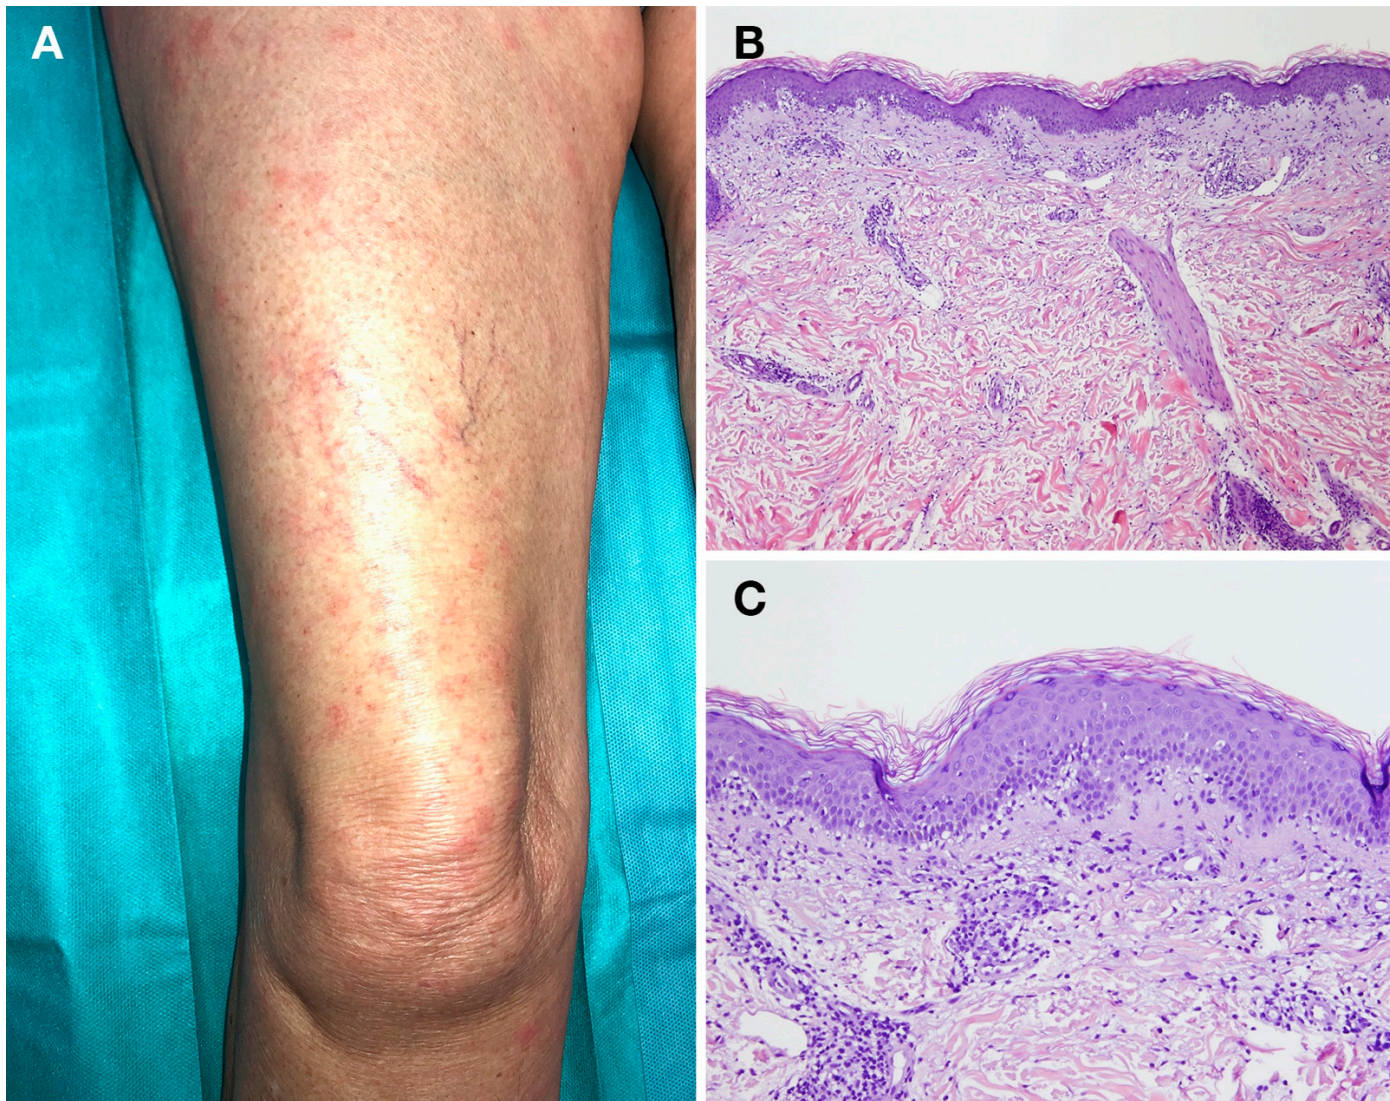

**Figure S1. Patient 21 from Supplementary Table 1.** (A) 70-year-old woman presented erythematous macules that affected her lower extremities, associated with fever and dry cough. COVID-19 PCR was negative, but IgG serology was positive on follow-up; (B) A skin biopsy performed on the thigh showed an interface dermatitis with perivascular inflammatory infiltrates in the superficial dermis (Hematoxylin-eosin stain, original magnification x40). Direct immunofluorescence was negative.

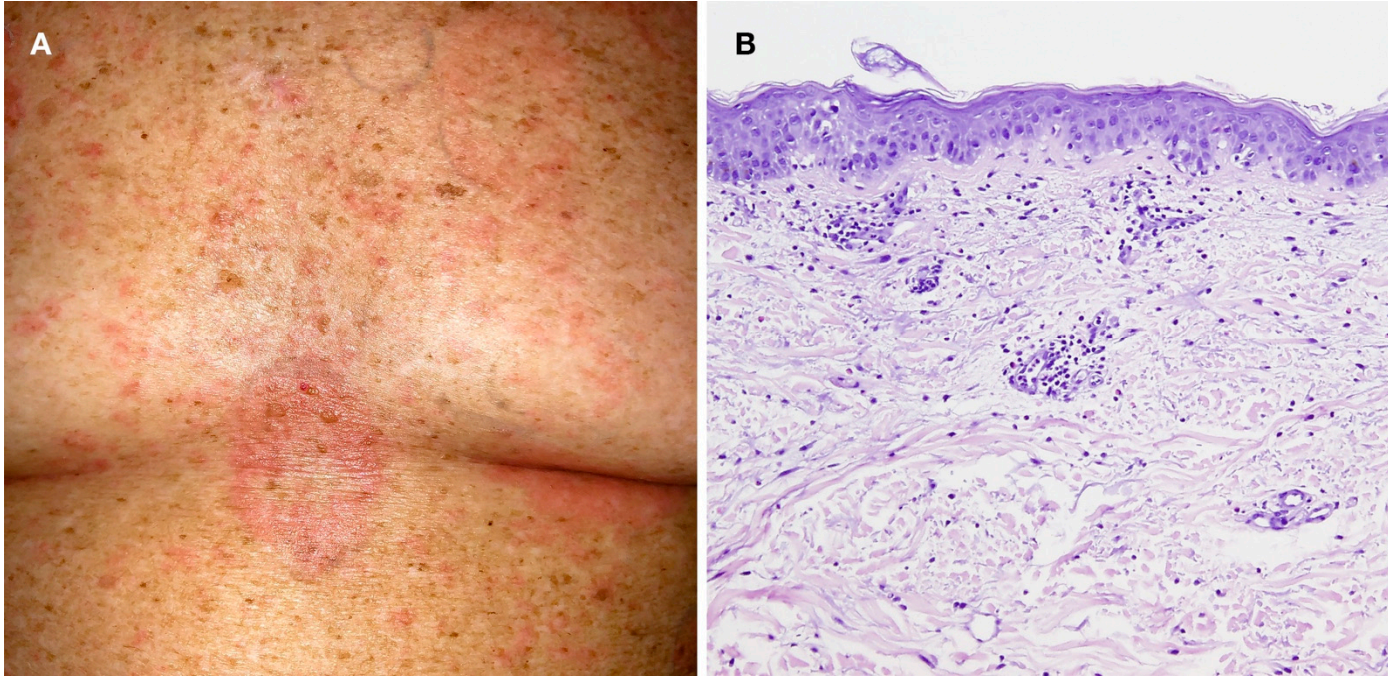

**Figure S2.** Patient 35 from Supplementary Table 1. (A). 77-year-old woman with confirmed diagnosis of COVID-19. Erythematous papules and plaques on the chest and upper abdomen on the 21th day from diagnosis; (B). Mild interface dermatitis and perivascular inflammatory lymphocytic infiltrates (with scarce eosinophils). Hematoxylin-eosin stain, original magnification x100. Direct immunofluorescence was negative.

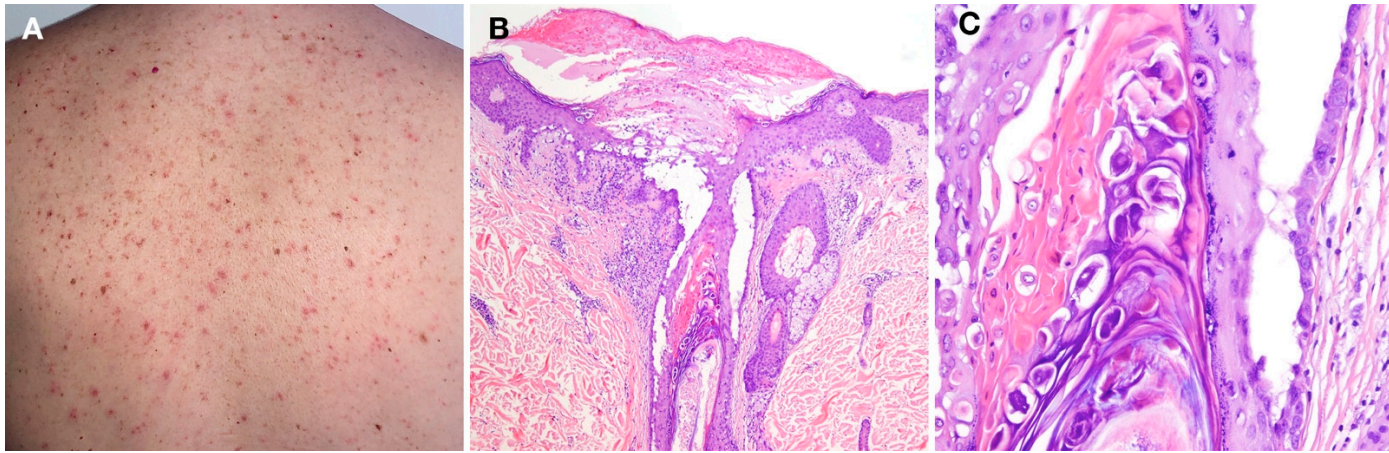

**Figure S3.** Patient 32 from Supplementary Table 1. (A) 50-year-old woman presented erythematous and purpuric papules on the back; (B) Histology showed an intraepidermal and intrafollicular vesicle in relation with follicular infundibulum, extensive suprabasal acantholysis, and mild superficial perivascular lymphocytic infiltrates (Hematoxylin-eosin stain, original magnification x40). Amplified image shows suprabasal acantholysis with abundant dyskeratotic keratinocytes and corps ronds (Hematoxylin-eosin stain, x100).

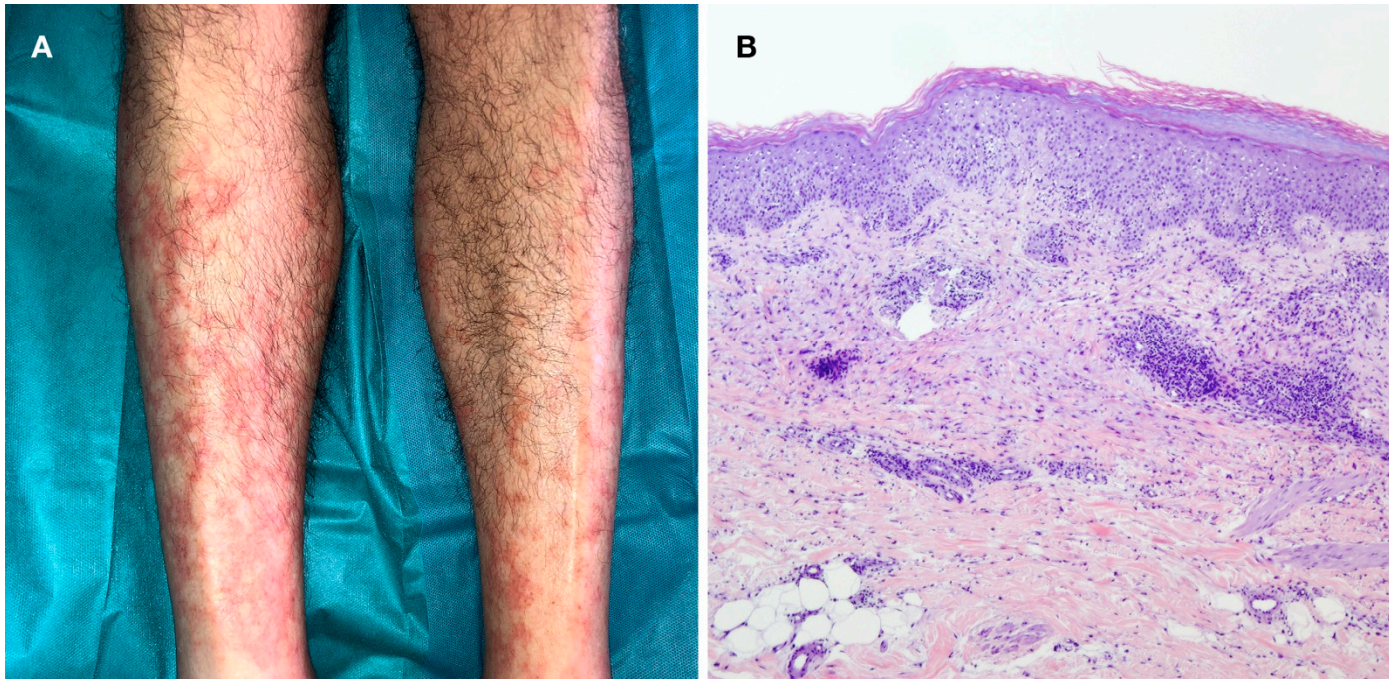

**Figure S4.** Patient 35 from Supplementary Table 1. (A) 70-year-old male presented with pruritic erythematous rash on lower limbs with a livedo reticularis pattern. (B) Slight acanthotic epidermis with spongiosis and lymphocytic and eosinophilic exocytosis, and focal vacuolization along the basement membrane. There were moderate lymphocyte and eosinophil perivascular infiltration in the superficial and mid dermis, (Hematoxylin-eosin stain, and original magnification x 40). Direct immunofluorescence was negative.
